# Supplementary material
Source: PubMed Central journal article supplement (PMC3242615)
Supplement: auto0710_1187SD1.pdf [file auto0710_1187SD1.pdf]

# Supplementary Figure S1

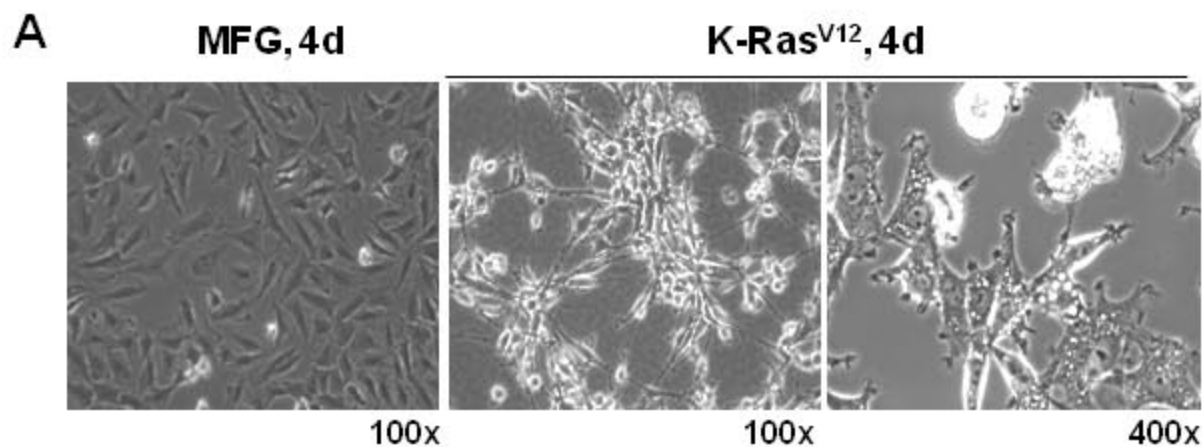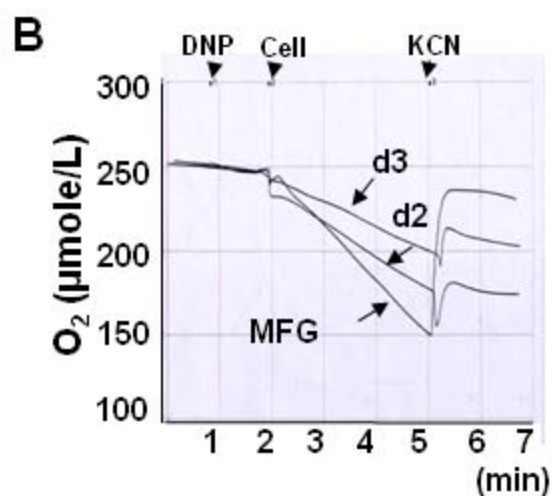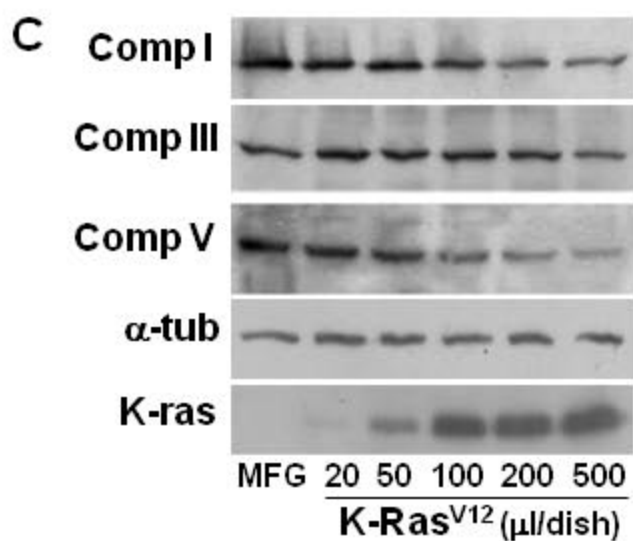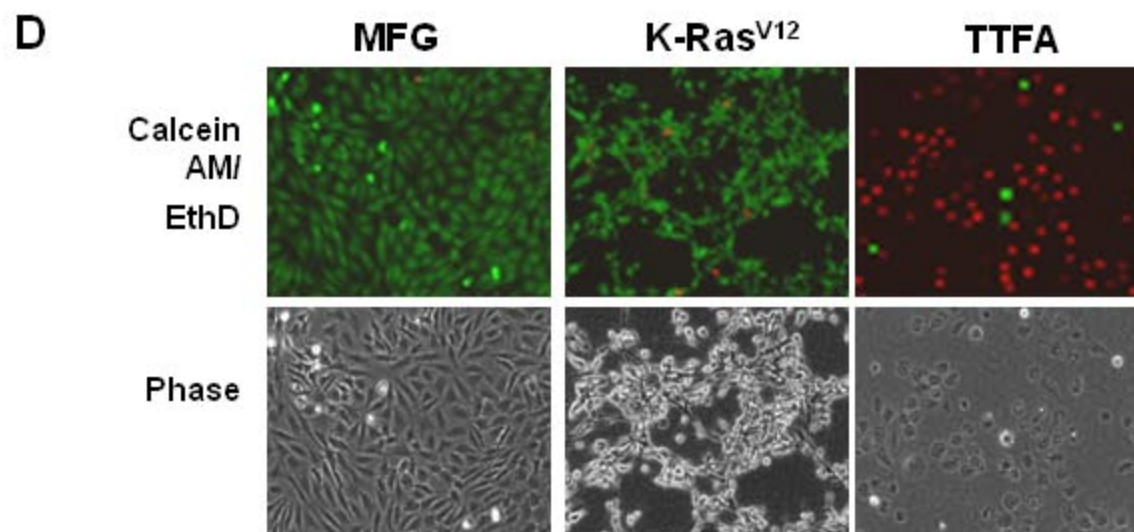

## Supplementary Figure S2

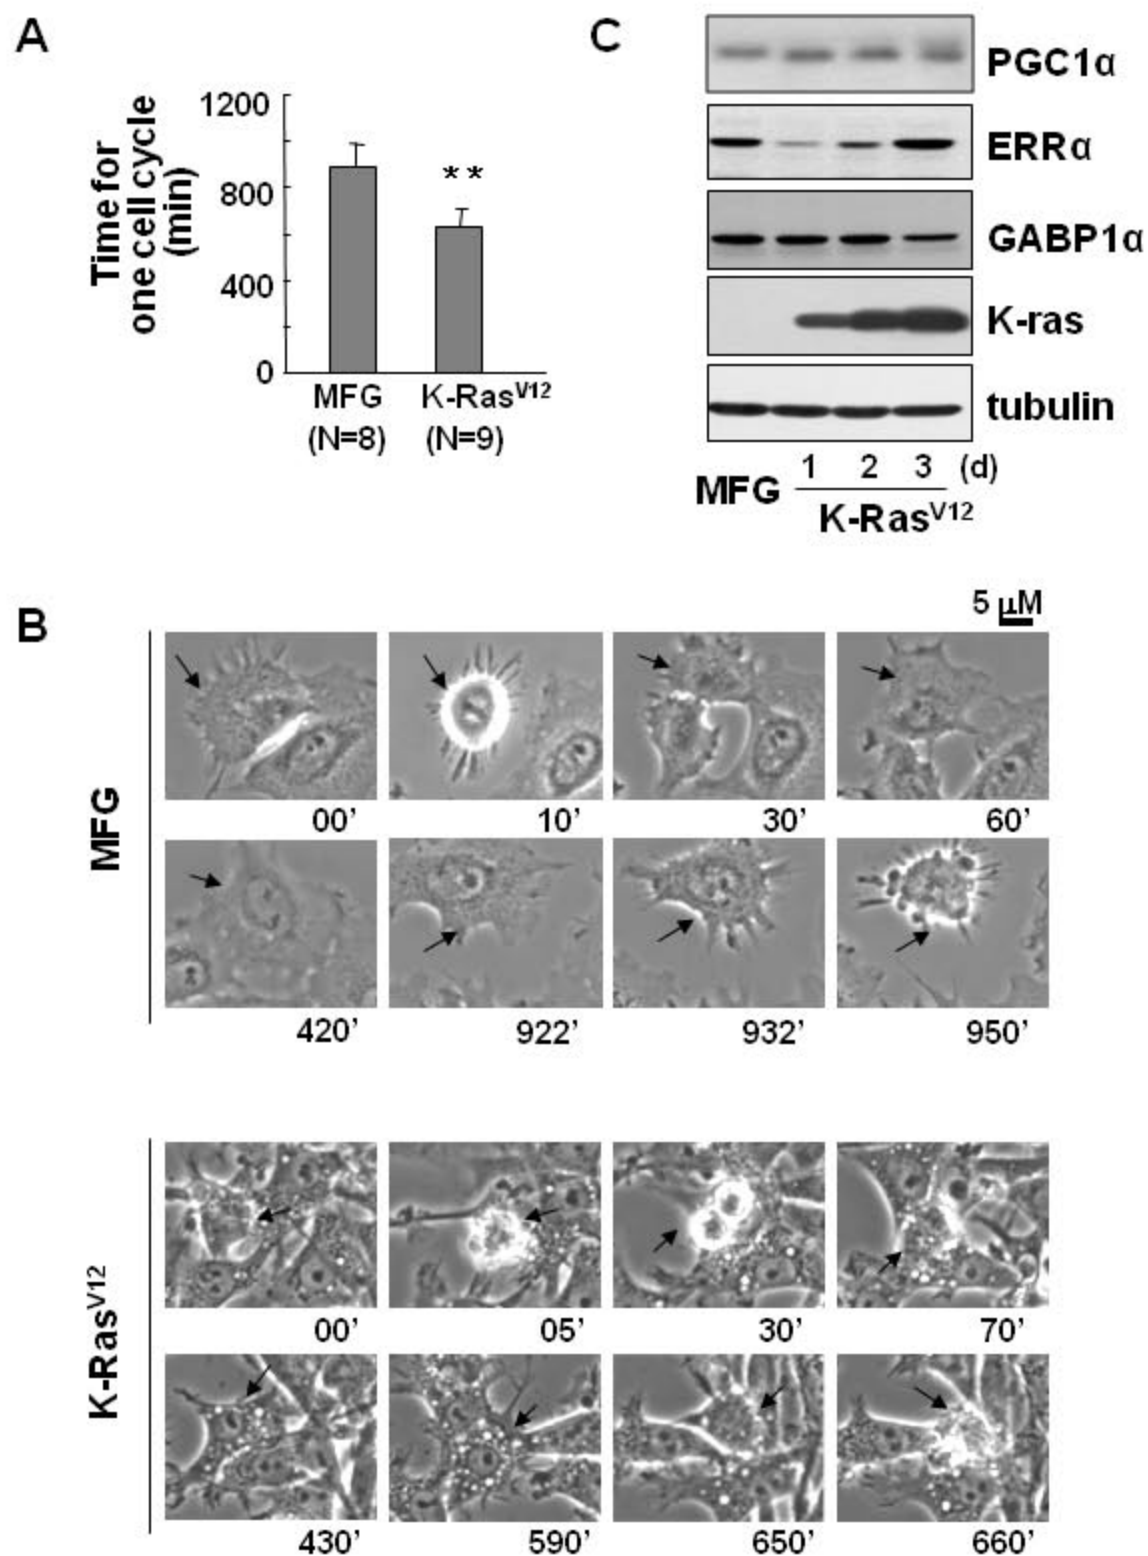

## Supplementary Figure S3

### Up-expressed genes

|               |                                                         |
|---------------|---------------------------------------------------------|
| 1. XM_575782  | <b>ATPase, H<sup>+</sup> transporting, Vo subunit D</b> |
| 2. BC074011   | <b>beclin1</b>                                          |
| 3. NM_019359  | calponin 3, acidic                                      |
| 4. XM_216034  | CDKN1A interacting Zf protein 1                         |
| 5. NM_053354  | Cyt-5-methyltransferase 1                               |
| 6. BC060564   | H2A histone family                                      |
| 7. NM_206847  | phosphofructokinase                                     |
| 8. NM_022922  | triosephosphate isomerase 1                             |
| 9. XM_215416  | pyrophosphatase                                         |
| 10. NM_012949 | enolase 3, beta                                         |
| 11. NM_012580 | heme oxygenase 1                                        |
| 12. BC081928  | vaccinia related kinase 3                               |
| 13. XM_213624 | Mak3 homolog                                            |
| 14. NM_030867 | nuclear factor of kappa light chain                     |
| 15. XM_237999 | Gadd45 gamma                                            |
| 16. M99252    | osteopontin                                             |
| 17. NM_053883 | dual specificity phosphatase 6                          |
| 18. XM_342949 | ribosomal protein L11                                   |
| 19. NM_019356 | translation initiation factor 2 subunit 1 alpha         |
| 20. XM_575396 | testis derived transcript                               |
| 21. BC060548  | putative ISG12(a) protein                               |
| 22. BC083790  | Uncharacterized gene                                    |
| 23. NM_199090 | Uncharacterized gene                                    |
| 24. CF115498  | Uncharacterized gene                                    |

### Down-expressed genes

|               |                                                   |
|---------------|---------------------------------------------------|
| 1. XM_341957  | interferon induced transmembrane protein 3        |
| 2. XM_213484  | vesicle amine transport protein 1                 |
| 3. BC087063   | cell division cycle associated 2                  |
| 4. AJ005394   | collagen alpha1 type V                            |
| 5. BC061777   | secreted acidic cystein rich glycoprotein         |
| 6. XM_213440  | collagen alpha type 1                             |
| 7. NM_019143  | fibronectin 1                                     |
| 8. NM_053598  | nudix-type motif 4                                |
| 9. NM_031970  | heat shock 27kDa protein 1                        |
| 10. BC083876  | pleckstrin homology containing, family C member 1 |
| 11. XM_213849 | nuclear factor I/X                                |
| 12. NM_139398 | RNA helicase                                      |
| 13. NM_031099 | ribosomal protein L5                              |
| 14. BQ210711  | Uncharacterized gene                              |
| 15. AI454608  | Uncharacterized gene                              |
| 16. BI295306  | Uncharacterized gene                              |
| 17. CB327868  | Uncharacterized gene                              |
| 18. CN541734  | Uncharacterized gene                              |
| 19. CF111629  | Uncharacterized gene                              |
| 20. BC089991  | Uncharacterized gene                              |
| 21. CK839196  | Uncharacterized gene                              |

## Supplementary Figure S4

A

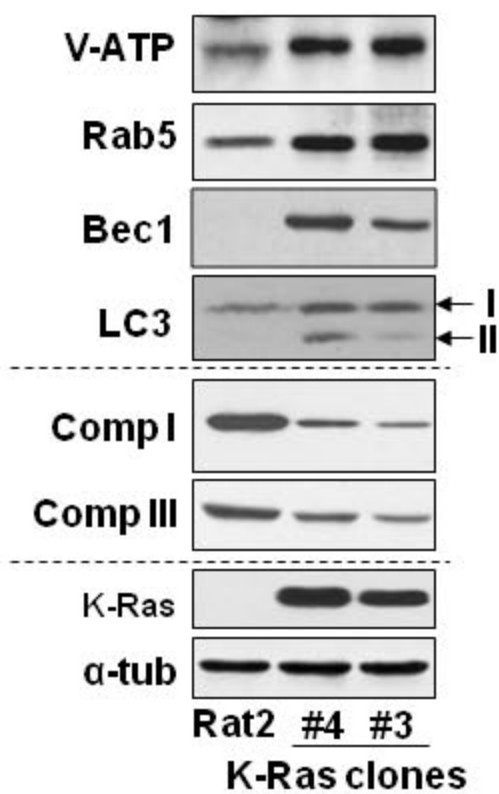

B

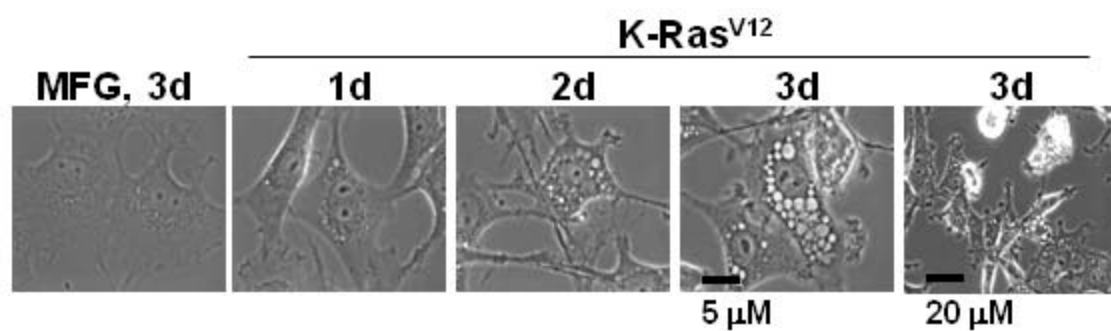

## Supplementary Figure S5

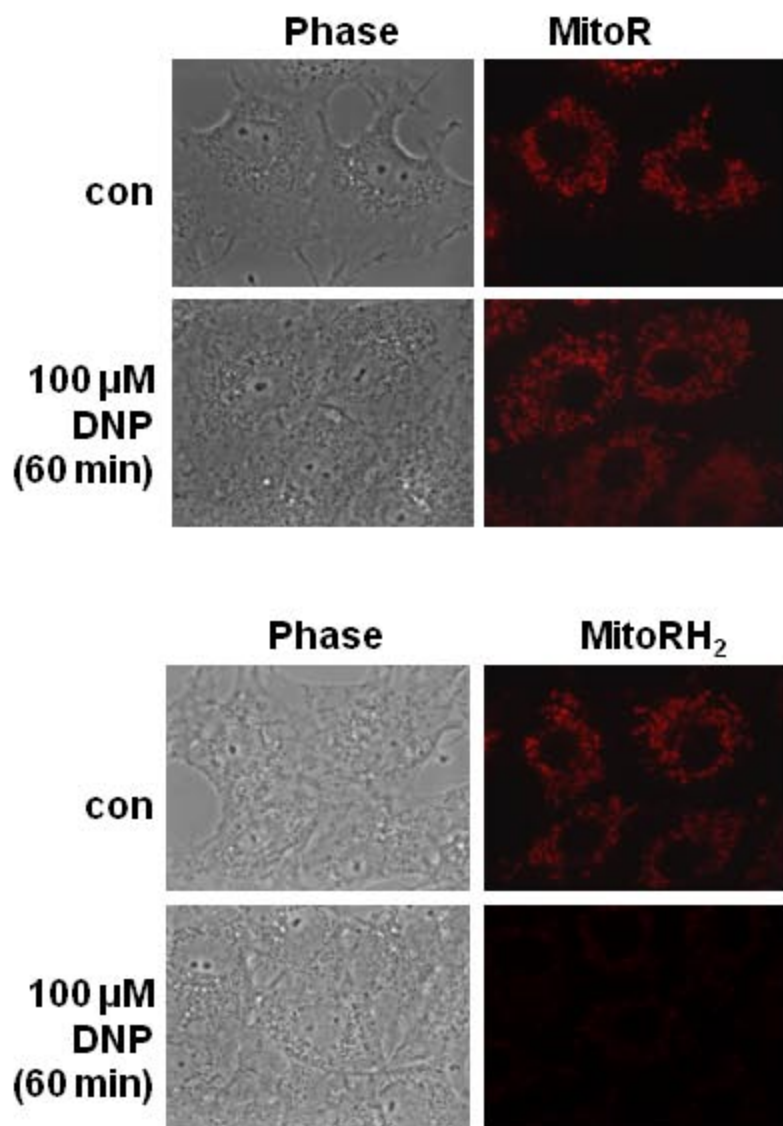

Supplementary Figure S6

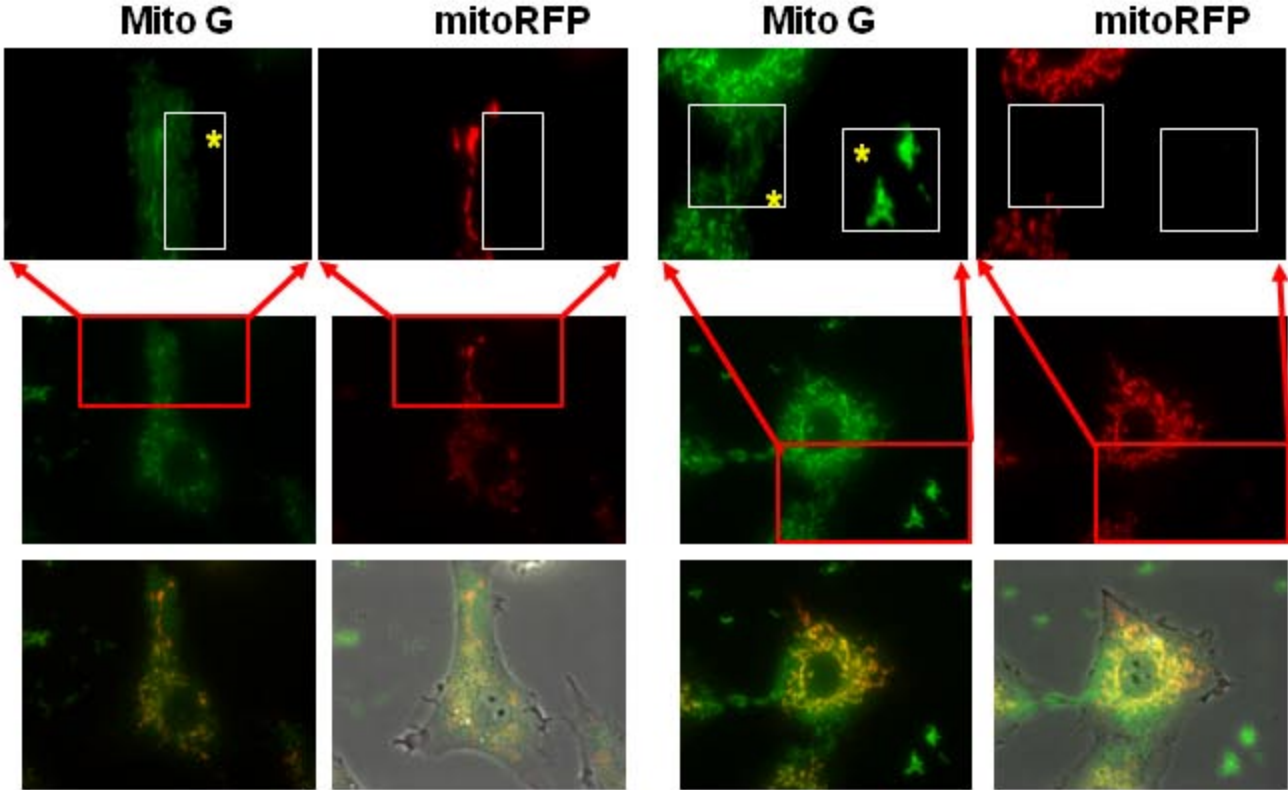

## Supplementary Figure S7

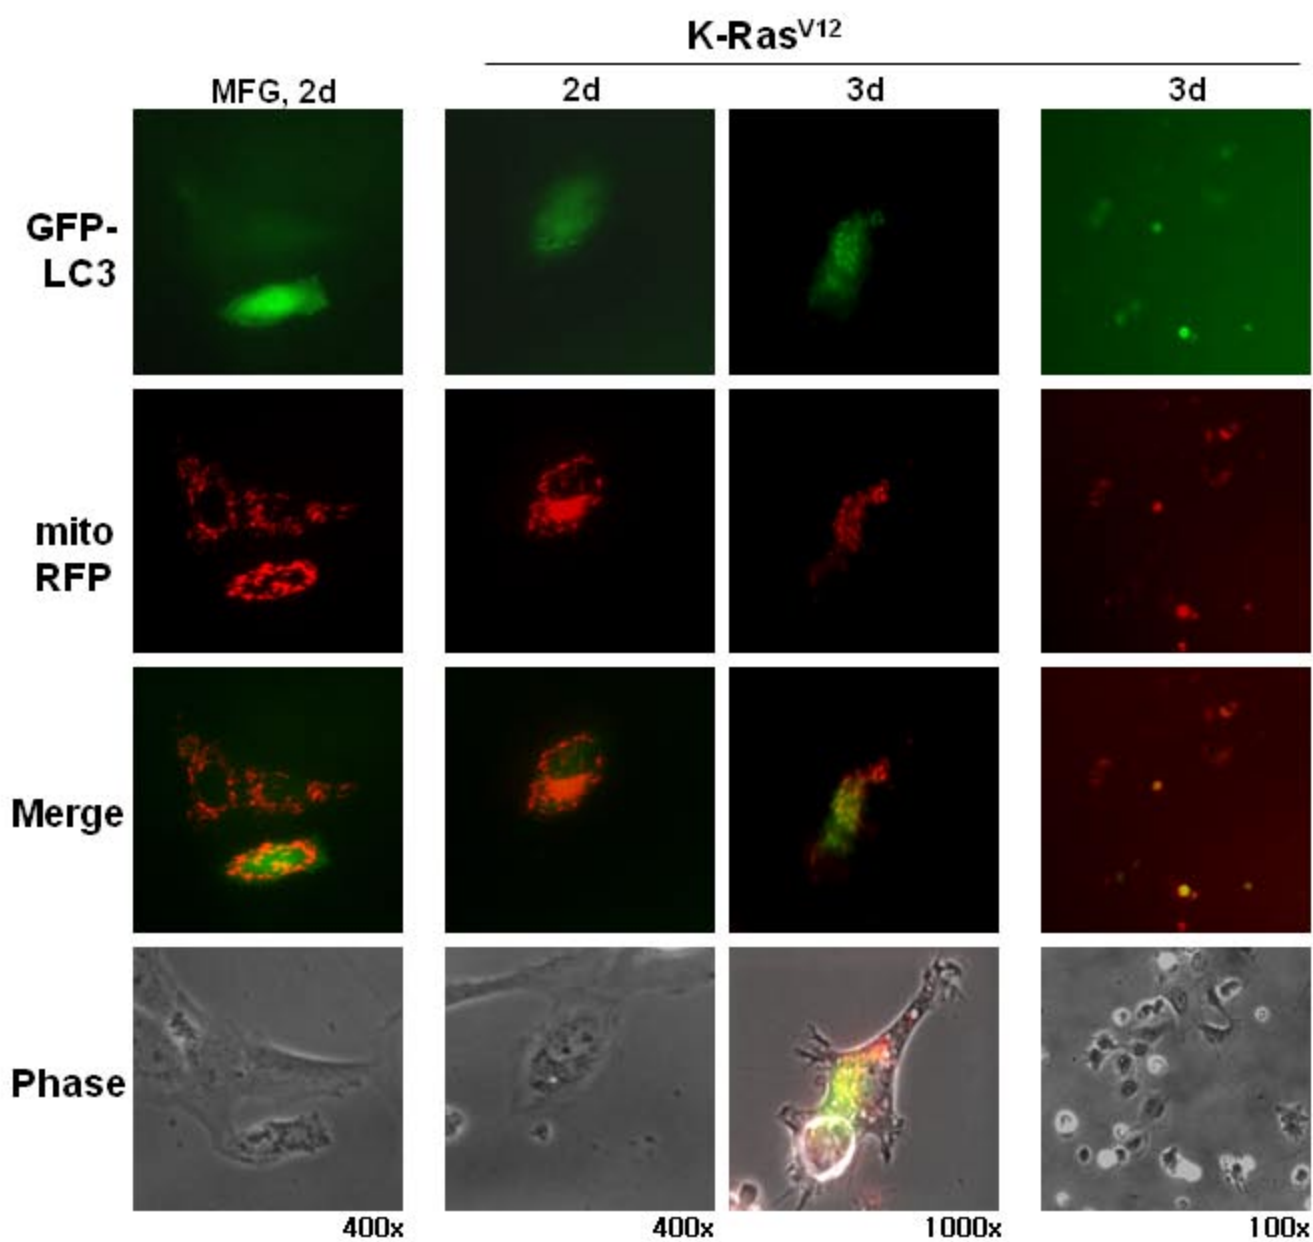



## Supplementary Figure S8

**A**

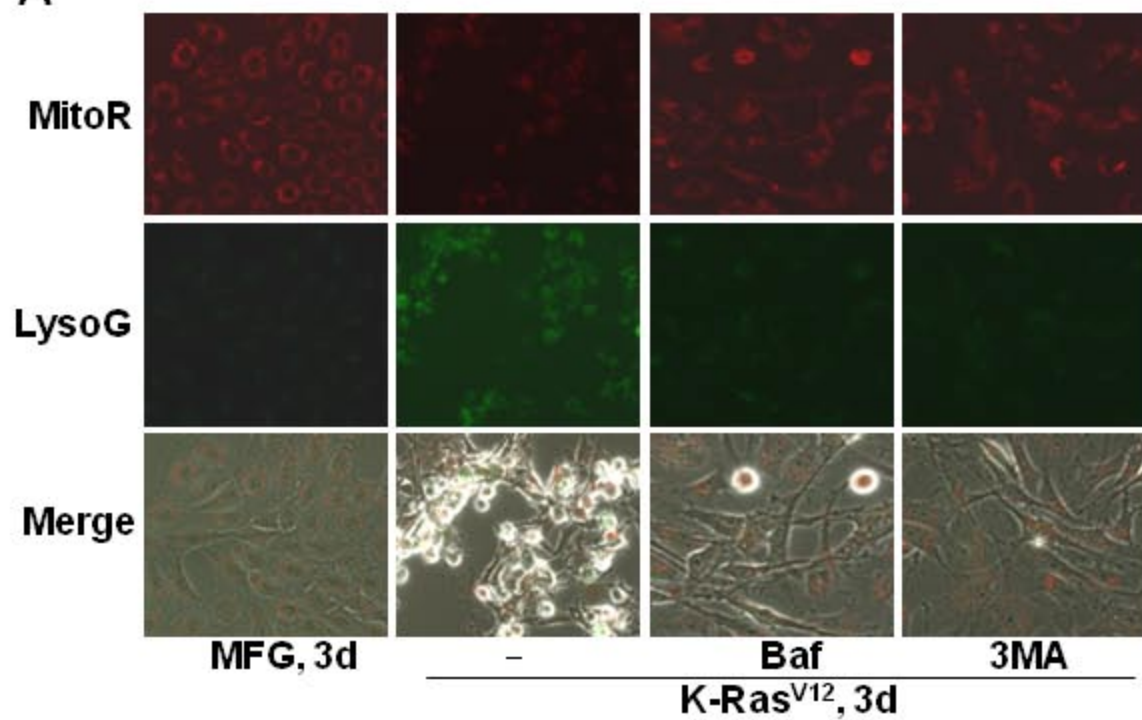

**B**

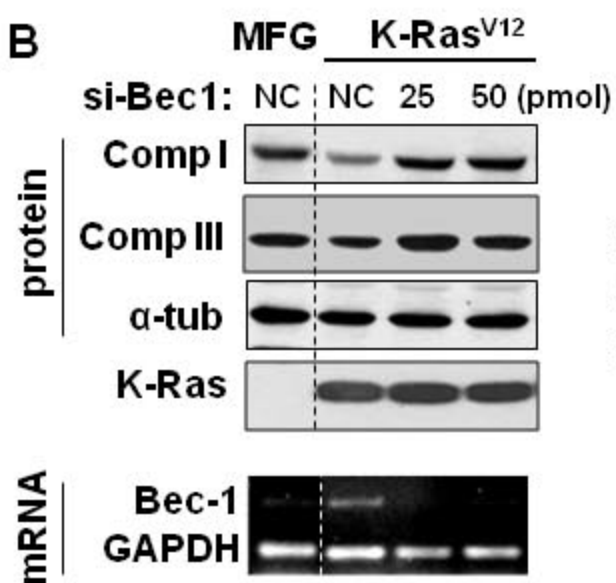

**C**

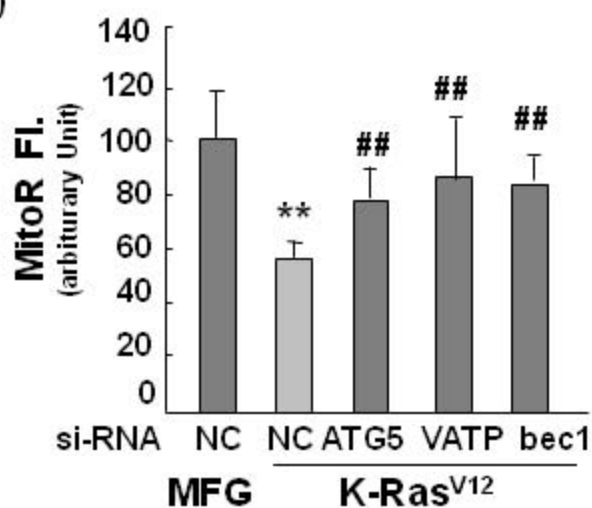



## Supplementary Figure S9

**A**

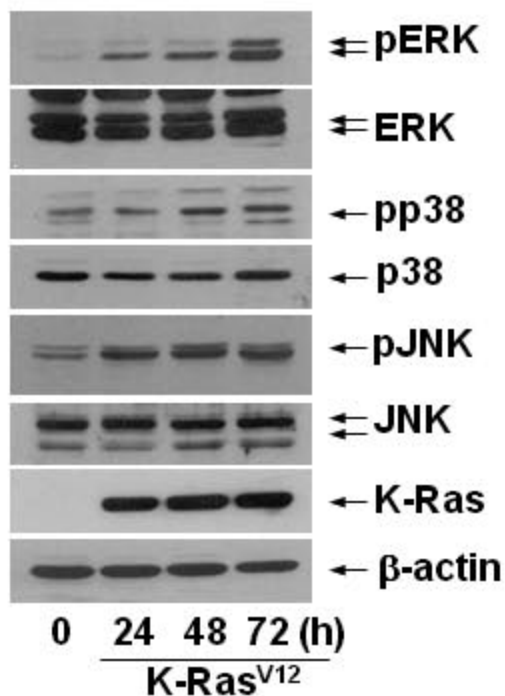

**B**

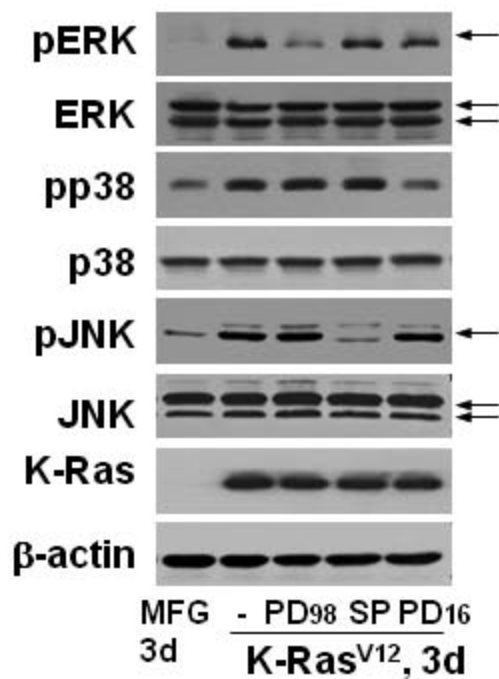

**C**

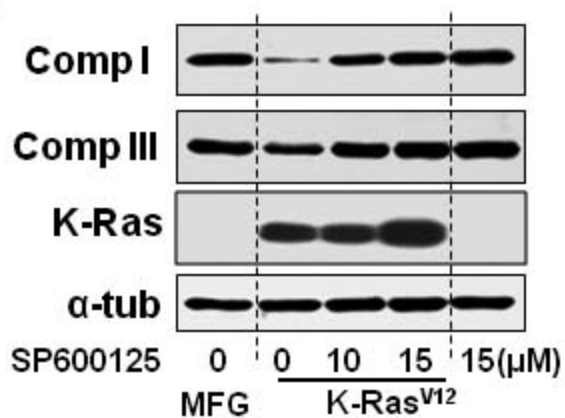

**D**

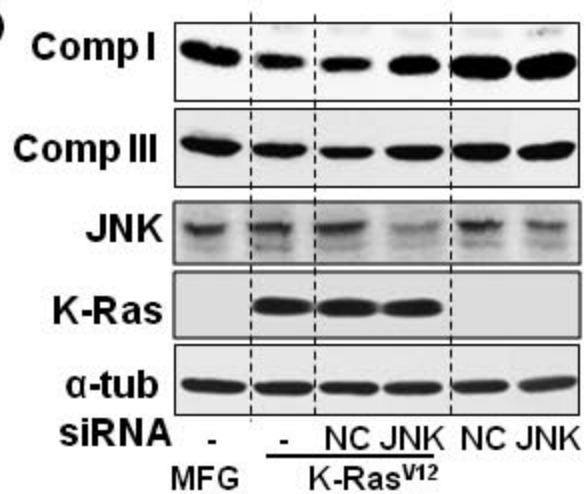

## Supplementary Figure S10

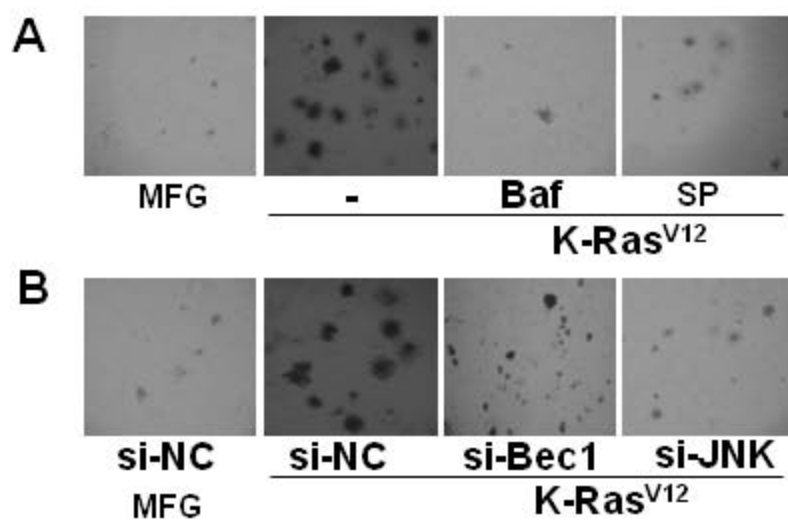

## Supplementary Figure S11

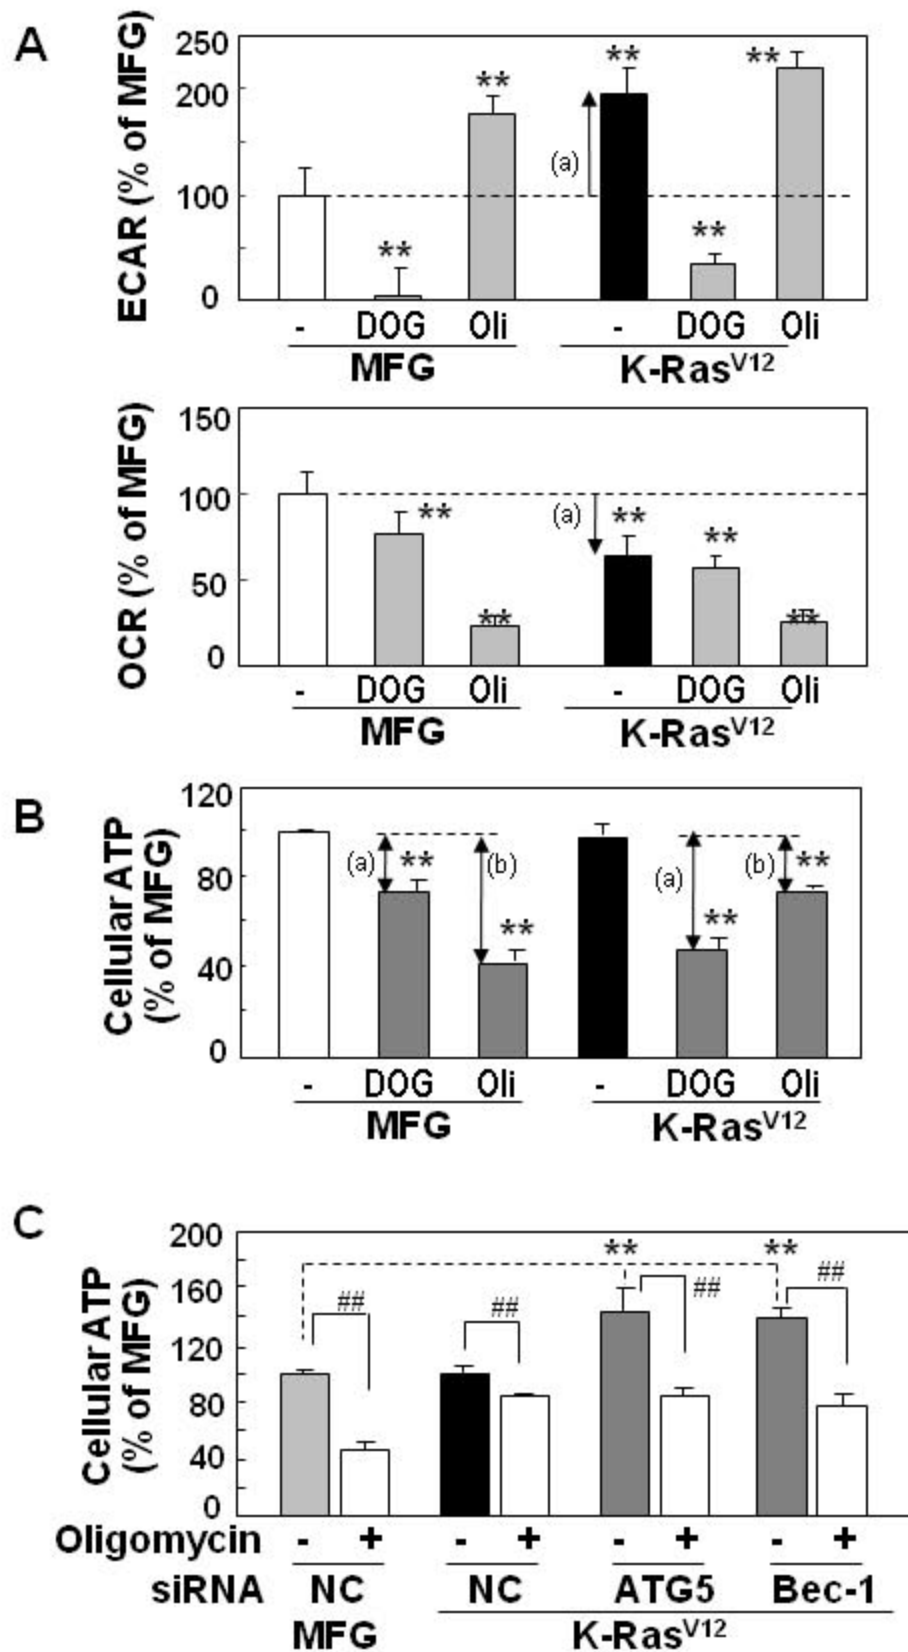

## Figure Legends for Supplementary Figures

**Supplementary Fig. S1.** Cell morphology and viability of K-Ras<sup>V12</sup>-infected Rat2 cells. Rat2 cells were infected with the indicated volumes of retrovirus harboring K-Ras<sup>V12</sup> for the indicated periods. **(A)** Cell morphology was visualized with phase-contrast images. **(B)** Representative pattern of maximum oxygen consumption rate using Mitocell equipped with Clark oxygen electrode (782 Oxygen Meter). **(C)** Western blot analysis. **(D)** Cell viability was assessed by the LIVE/DEAD cell viability assay. The cells were continuously cultured for 5 day after infection with K-Ras<sup>V12</sup> retrovirus. Green fluorescence (calcein AM, Cal-AM) indicates live cells and red fluorescence (ethidium homodimer, EthD) means dead cells. Dead cell treated by mitochondrial complex II inhibitor, 2-thonyltrifluoroacetone (TTFA) was used as control for EthD positive. K-Ras<sup>V12</sup>-infected cells continuously grow and become aggregated whereas control Rat2 cells infected by MFG mock virus grow only in a monolayer, showing their loss of contact inhibition property by K-Ras<sup>V12</sup>.

**Supplementary Fig. S2.** Time-lapse images of the K-Ras<sup>V12</sup>-infected cells for one cell cycle progression and protein expressions of mitochondrial biogenesis regulators. Time-lapse images acquired at 1 min intervals were analyzed to estimate the time for one cell cycle progression. **(A)** Time for one cell cycle progression was estimated. The time required for one cell division was significantly shortened in K-Ras<sup>V12</sup>-treated cells ( $11.6 \pm 1.2$  h), compared to control ( $16.8 \pm 4.2$  h). **(B)** Representative images for complete one cell division (from the point of cell detachment for mitosis outset to the point of re-detachment of the progeny for next mitosis) were shown. Arrows indicate the cells under being monitored. **(C)** Protein expressions of mitochondrial biogenesis regulators of Rat2 cells transiently infected by K-Ras<sup>V12</sup>.

**Supplementary Fig. S3.** Differentially expressed genes by K-Ras<sup>V12</sup> over-expression. Rat2 cells were infected with retrovirus harboring K-Ras<sup>V12</sup> for 1 and 3 days. Total RNAs were extracted from the cells and reverse transcription was performed against the RNAs using 10  $\mu$ M dT-ACP1 (5'-CGTGAATGCTGCGACTACGATIIIIIT(18)-3' and Moloney murine leukemia virus reverse transcriptase (200 U). First-strand cDNAs were applied to GeneFishing<sup>TM</sup> Kit (Seegene, Seoul, South Korea) according to the protocol provided. Differentially expressed genes by K-Ras<sup>V12</sup> were screened by ACP-based PCR method and persistently regulated genes in both cells infected for 1day and 3 days

were selected for directing sequencing. 50 sequenced genes (24 up-regulated and 21 down-regulated genes) are presented.

**Supplementary Fig. S4.** Protein expression profile of Rat2 cells stably expressing K-Ras<sup>V12</sup> by Western blot analysis **(A)**, and time-course changes of cell morphology of Rat2 cells transiently infected by K-Ras<sup>V12</sup> **(B)**.

**Supplementary Fig. S5.** Differential dependency of two different mitochondria-targeting fluorescent dyes on mitochondrial membrane potential. Rat2 cells were treated with 100  $\mu$ M 2,4-dinitrophenol (Sigma-Aldrich) for 60 min and stained with 200 nM CMXRos (MitoR, Molecular Probe, M-7512) or 200 nM CMH<sub>2</sub>XRos (MitoRH<sub>2</sub>, Molecular Probe, M7513) for 10 min and visualized with Axiovert 200M fluorescence microscopy.

**Supplementary Fig. S6.** Non-specific targeting of MitoTracker Green to cell membrane or cell debris. Rat2 cells expressing mitochondria-targeting RFP (mitoRFP) were stained with 200 nM MitoTracker Green (Molecular Probe, M7514) and visualized with Axiovert 200M fluorescence microscopy. MitoTracker Green was targeted nonspecifically to cellular debris of plasma membrane even after washing twice with PBS (indicated with box).

**Supplementary Fig. S7.** Effect of K-Ras<sup>V12</sup> on Rat2 cells expressing GFP-LC3. Rat2 cells were transfected with the two plasmids encoding GFP-LC3 and mitoRFP 18 h prior to K-Ras<sup>V12</sup> infection and fluorescence images were taken. Most Rat2 cells expressing GFP-LC3 were dead after infection with K-Ras<sup>V12</sup> retrovirus, implying that well balanced control between anti-death signal and autophagy activation by K-Ras is important.

**Supplementary Fig. S8.** Recovery of mitochondria by blocking autophagy. **(A)** Rat2 cells were exposed to bafilomycin A (1 nM) or 3MA (3 mM) 1 h prior to K-Ras<sup>V12</sup> infection, and further incubated for 3 days. Then, cells were co-stained with 50 nM LysoTracker Green and 200 nM MitoTracker Red without fixation to visualize changes of mitochondrial and lysosomal mass with fluorescence microscopy. Images with 200x magnification are presented. Green indicates lysosomes and red indicates mitochondria. **(B)** Rat2 cells were transfected with siRNA for beclin-1 (si-beclin-1) 15 h prior to K-Ras<sup>V12</sup> infection, and further incubated for 3 days. Expression of respiratory protein was

monitored by Western blot (upper three panels) and mRNA level of beclin-1 was estimated by RT-PCR (lower panel). **(C)** Mitochondrial mass was estimated as described in 'Materials and methods' after Rat2 cells were transfected with si-ATG5, si-VATPaseE, and si-beclin-1 15 h prior to K-Ras<sup>V12</sup> infection, and further incubated for 3 days. \*\*, p<0.01 vs. MFG (si-NC) control and <sup>##</sup>, p<0.01 vs. K-Ras-infected (si-NC) cells by one-way ANOVA.

**Supplementary Fig. S9.** K-Ras<sup>V12</sup>-induced autophagy is mediated through JNK. **(A)** Rat2 cells were infected with retrovirus harboring K-Ras<sup>V12</sup> for the indicated periods. Phosphorylation status of MAPKs (ERK, p38, and JNK) was monitored by Western blot analysis. **(B)** Western blot analysis. Rat2 cells were exposed to pharmacological inhibitors (15  $\mu$ M PD98059, 15  $\mu$ M SP600125, or 15  $\mu$ M PD169316) prior to K-Ras<sup>V12</sup> infection and further incubated for 3 days as indicated. **(C, D)** Western blot analysis. Rat2 cells were exposed to SP600125 or transfection of si-RNAs (si-NC, si-beclin-1, si-JNK) prior to K-Ras<sup>V12</sup> infection and further incubated for 3 days.

**Supplementary Fig. S10.** Blocking autophagy inhibits K-Ras<sup>V12</sup>-induced cell transformation. Rat2 cells were exposed to pharmacological inhibitors (15  $\mu$ M SP600125 or 1 nM Bafilomycin A) or transfection of si-RNAs (si-NC, si-beclin-1, si-JNK) prior to K-Ras<sup>V12</sup> infection and soft-agar colony forming assay was performed.

**Supplementary Fig. S11.** Metabolic alteration by K-Ras. **A-B,** After infected by K-Ras<sup>V12</sup> retrovirus for 3 days, Rat2 cells were treated with 2  $\mu$ M oligomycin (Oli) or 25 mM 2-deoxyglucose (DOG) for 3 h. **(A)** Extracellular acidification rate (ECAR) and cellular oxygen consumption rate (OCR) were simultaneously measured by Seahorse XF analyzer as described in 'Materials and Methods.' (a) indicates changes by K-Ras. **(B)** Intracellular ATP levels. DOG-sensitive (glycolysis dependent) and Oli-sensitive (mitochondrial respiration dependent) ATP production are indicated as (a) and (b), respectively. **(C)** Intracellular ATP levels. Rat2 cells were transfected with si-ATG5 or si-Beclin-1 (Bec-1) 15 h prior to K-Ras<sup>V12</sup> infection and further incubated for 3 days, then treated with 2  $\mu$ M oligomycin for 3 h.
